# Supplementary material for: A local ATR-dependent checkpoint pathway is activated by a site-specific replication fork block in human cells
Source: eLife journal article supplement (doi:10.7554/elife.87357), 2023-05-23
Supplement: fig1-data1 [file Figure 1B.xlsx]

## Sheet: Figure 1B
	VC						HA Tus His
PP0-2	0.384191	0.345612	0.556743	0.299166	0.144622	0.141303	0.436823	0.436779	0.603879	0.352181	0.281034	0.298091
PP9	0.207907	0.193256	0.202808	0.0938274	0.800422	1.22354	2.59827	2.53419	3.58006	2.26163	6.88808	4.49049
PP2	0.318237	0.209908	0.0996814	0.0865877	0.0812855	0.0969881	2.16507	1.82509	1.89494	1.85173	1.54077	1.22904
PP52	0.361147	0.349186	0.415704	0.353947	0.360857	0.33197	0.387077	0.363362	0.401363	0.424134	0.335702	0.311668
PP47	0.290134	0.284248	0.156607	0.29076	0.430123	0.517914	2.82183	2.89478	2.97246	3.37347	5.98646	5.76603
PP10	0.182077	0.168607	0.662535	0.414092	0.366887	0.370505	0.182077	0.168607	0.662535	0.414092	0.366887	0.370505
