# Supplementary material for: A local ATR-dependent checkpoint pathway is activated by a site-specific replication fork block in human cells
Source: eLife journal article supplement (doi:10.7554/elife.87357), 2023-05-23
Supplement: fig1-data1 [file Figure 1E.xlsx]

## Sheet: Figure 1E
	HA	His	PLA	PLA
PLA 11	3.1	10.6	7	19.6
PLA 12	6.4	9.4	10.3	25.5
PLA 16	8.6	8.5	8.7	14.7
