# Supplementary material for: A local ATR-dependent checkpoint pathway is activated by a site-specific replication fork block in human cells
Source: eLife journal article supplement (doi:10.7554/elife.87357), 2023-05-23
Supplement: fig2-data1 [file Figure 2H.xlsx]

## Sheet: Figure 2H
	VC						HA Tus His
PP0-2	2.77871	2.55587	1.97831	1.97807	2.51452	2.69678	7.81743	3.89881	7.54901	4.07349	9.18125	6.90303
PP9	3.60056	2.23682	14.939	15.7603	2.53972	3.43935	8.32126	5.19811	54.6714	42.3554	1.67843	2.61428
PP2	1.62607	1.99032	5.72476	4.89023	2.41724	2.86265	1.89303	2.48798	1.27557	1.93851	1.75841	1.37997
PP52	2.56992	2.86739	1.47749	1.57639	2.13457	2.81557	2.29719	2.66881	2.04945	2.55721	5.21841	7.99655
PP47	5.42118	4.54676	0.613951	1.18542	3.60972	4.42742	3.6123	4.66534	1.61184	1.08492	4.04735	8.46449
PP10	3.10663	2.74149	1.97704	1.72926	2.93041	3.06615	9.71444	5.12048	6.07187	3.47493	8.0602	6.61279
