# Supplementary material for: A local ATR-dependent checkpoint pathway is activated by a site-specific replication fork block in human cells
Source: eLife journal article supplement (doi:10.7554/elife.87357), 2023-05-23
Supplement: fig2-figsupp2-data1 [file Figure 2-Fig Sup 2.xlsx]

## Sheet: Figure 2-Fig Sup 2
	VC						HA Tus His
PP0-2	0.411034	0.463357	2.88158	2.64647	2.35883	2.10359	1.45043	1.8692	5.45093	6.24892	11.461	6.42993
PP9	0.611361	0.140719	16.3402	9.03364	1.7367	0.988138	3.17393	4.00877	52.2548	47.3059	5.15342	3.72548
PP2	0.91553	2.35705	6.309	6.83018	3.73195	2.98471	3.9744	2.45451	1.51257	1.21985	4.52892	4.07443
PP52	1.552	1.13244	2.51445	2.51549	3.00722	3.02271	2.79297	1.49112	2.92854	3.23866	4.37212	5.71798
PP47	1.81005	2.67939	1.06545	0.934554	2.60803	2.62196	7.24951	13.4095	1.00506	0.994945	8.56527	8.83879
PP10	1.29643	1.02344	2.65344	2.6429	2.59377	2.40318	2.4756	1.36947	4.76949	5.21402	10.208	6.47903
