# Supplementary material for: A local ATR-dependent checkpoint pathway is activated by a site-specific replication fork block in human cells
Source: eLife journal article supplement (doi:10.7554/elife.87357), 2023-05-23
Supplement: fig3-data2 [file Figure 3D.xlsx]

## Sheet: Figure 3D
	HA	γH2AX	PLA	PLA
PLA 7	1.4	0.8	0.4	16.6
PLA 11	4.3	1.6	4.6	17.4
PLA 16	0.4	10.3	3.1	14.6
