# Supplementary material for: A local ATR-dependent checkpoint pathway is activated by a site-specific replication fork block in human cells
Source: eLife journal article supplement (doi:10.7554/elife.87357), 2023-05-23
Supplement: fig3-data2 [file Figure 3F.xlsx]

## Sheet: Figure 3F
	VC			HA Tus
PP0-2	1.76546	2.85634	2.20048	2.11058	1.29053	1.63352
PP9	1.38884	1.7439	0.282151	7.92553	4.33959	5.39752
PP2	2.05216	1.87089	1.6847	2.74079	1.233	7.94169
PP52	1.73245	2.06069	1.67937	2.14782	2.16998	2.0497
PP47	1.72975	2.71034	2.35417	10.2381	4.34115	8.95266
PP10	0.582688	0.695392	1.17321	1.44168	0.747077	1.0225
