# Supplementary material for: A local ATR-dependent checkpoint pathway is activated by a site-specific replication fork block in human cells
Source: eLife journal article supplement (doi:10.7554/elife.87357), 2023-05-23
Supplement: fig3-figsupp1-data2 [file Figure 3-Fig Sup 1D.xlsx]

## Sheet: Figure 3-Fig Sup 1D
	VC				Tus				Cas9
PP10	1	1	1		2.47419	1.07433	0.871541		6.05364	6.09706	13.3249	12.4136
PP0-2	1	1	1		1.19549	0.451814	0.742349		2.45122	2.70101	0.5823	1.46213
