# Supplementary material for: A local ATR-dependent checkpoint pathway is activated by a site-specific replication fork block in human cells
Source: eLife journal article supplement (doi:10.7554/elife.87357), 2023-05-23
Supplement: fig3-figsupp2-data1 [file Figure 3-Fig Sup 2B.xlsx]

## Sheet: Figure 3-Fig Sup 2B
VC			Tus			VC			Tus
0	0	1	0	5	2	27	0	0	0	0	0
0	0	0	0	11	0	0	1	1	0	2	0
0	0	0	0	0	0	0	0	0	59	1	15
2	0	2	0	7	0	5	1	1	9	15	0
7	0	0	12	2	9	1	4	4	3	0	3
0	0	0	0	13	1	0	0	0	19	0	11
0	7	0	0	1	1	0	22	22	31	1	1
0	1	0	2	13	0	0	17	17	2	0	31
0	4	0	3	0	3	0	14	14	1	3	3
0	5	0	2	1	1	33	31	31	52	0	29
0	4	0	20	5	3	1	2	2	17	47	7
0	3	1	3	2	0	0	65	65	25	1	13
0	4	2	2	2	1	0	79	79	1	0	8
1	3	2	0	8	3	2	1	1	8	0	1
1	2	1	4	5	0	0	23	23	1	0	10
0	4	1	0	22	1	0	5	5	3	58	0
2	0	5	1	2	6	12	1	1	57	2	17
0	49	6	51	2	7	2	21	21	7	14	1
1	4	0	0	1	0	163	111	111	66	2	13
0	9	2	0	6	7	4	5	5	56	1	1
21	2	2	5	0	4	59	3	3	4	34	4
1	0	1	0	5	0	0	1	1	0	0	19
2	0	0	0	2	1	0	10	10	76	11	39
0	1	2	13	12	6	4	0	0	8	1	16
1	1	0	1	9	1	2	59	59	13	1	0
1	1	5	19	0	0	2	0	0	0	1	0
23	1	1	0	1	3	34	0	0	0	1	3
1	1	2	24	0	25	5	4	4	4	1	1
3	0	3	2	1	5	88	52	52	18	4	0
0	2	9	8	4	0	3	0	0	3	1	7
5	4	0	0	0	0	125	0	0	14	1	6
1	10	3	1	9	1	0	0	0	27	1	14
9	2	13	0	2	15	40	5	5	41	1	10
0	6	6	0	14	8	73	2	2	3	1	22
0	7	6	2	0	5	0	3	3	1	4	0
0	0	0	3	6	4	2	0	0	0	2	0
0	0	3	0	9	0	7	2	2	3	1	0
0	1	0	1	2	13	0	3	3	0	1	1
0	3	6	6	0	0	1	3	3	12	0	11
0	9	0	4	21	1	32	4	4	0	0	6
3	2	0	2	0	4	3	1	1	0	6	1
0	2	3	0	3	2	3	0	0	1	2	0
3	2	0	4	1	3	0	1	1	42	2	5
6	5	1	4	0	1	27	8	8	0	45	5
1	3	3	2	0	0	40	7	7	2	0	1
2	4	0	1	3	3	16	0	0	0	3	4
2	0	0	2	0	4	0	3	3	0	63	1
0	0	0	9	0	0	4	36	36	1	79	2
1	1	5	5	2	1	0	0	0	0	1	22
2	3	2	0	0	0	4	0	0	0	2	11
1	7	0	4	0	1	4	1	1	0	4	0
8	4	2	1	0	2	0	3	0	5	0	2
1	6	4	0	1	9	0	9	0	5	6	1
1	0	0	11	1	0	0	46	0	17	74	6
0	1	0	1	0	1	0	2	0	22	0	5
1	8	3	1	2	0	0	25	0	1	8	1
0	4	1	1	2	0	2	112	0	1	16	2
0	0	0	0	4	0	0	2	3	81	13	5
0	10	0	25	0	18	0	2	9	0	0	0
0	0	0	1	1	1	0	3	46	4	36	41
0	1	0	0	1	26	1	2	2	2	6	4
2	1	0	2	11	0	0	0	25	78	4	1
0	0	10	2	0	1	11	0	112	21	36	11
0	0	1	11	14	0	1	6	2	73	1	1
1	8	0	0	1	0	3	41	2	5	1	5
0	0	3	0	9	0	0	0	3	134	0	0
10	0	4	1	10	0	38	98	2	0	1	0
9	0	1	0	0	0	7	0	0	30	0	0
0	0	4	0	0	0	0	2	0	0	0	46
1	0	3	0	4	0	7	1	6	53	0	30
0	0	2	14	4	0	56	33	41	21	0	22
0	1	3	0	24	9	0	0	0	43	2	1
2	7	5	0	7	16	69	1	98	20	27	4
0	1	8	7	14	11	70	2	0	21	0	22
0	0	19	0	11	12	1	0	2	150	23	17
1	0	1	0	9	0	4	4	1	0	0	0
0	0	5	3	13	18	1	0	33	47	1	18
1	7	2	0	2	4	5	3	0	4	52	2
1	4	0	0	0	1	77	15	1	24	35	26
2	6	3	7	4	0	48	1	2	28	0	1
8	0	0	0	1	1	2	1	0	1	64	0
1	0	0	2	4	0	3	0	4	2	1	2
1	0	1	5	0	2	0	0	0	5	1	0
3	0	4	8	3	16	6	4	3	0	1	75
0	0	3	1	0	0	7	6	15	2	70	26
3	12	0	0	8	13	4	0	1	0	27	0
3	0	0	13	8	1	4	0	1	47	1	34
2	0	0	9	0	6	2	0	0	0	3	5
1	0	1	5	1	0	2	0	0	0	2	2
1	0	4	83	0	0	1	5	4	39	105	23
29	0	0	2	0	3	0	14	6	0	1	1
0	6	0	1	0	0	3	7	0	3	6	2
1	1	0	9	2	1	27	11	0	0	69	60
6	3	0	3	0	0	5	1	0	19	58	13
3	0	0	12	0	3	4	2	0	1	2	1
1	4	0	1	0	14	0	2	5	4	1	6
0	3	3	5	0	0	0	2	14	0	0	0
0	0	0	1	0	2	8	0	7	1	102	1
1	1	0	20	1	4	31	26	11	1	3	2
0	4	3	2	0	0	1	69	1	29	19	3
0	4	0	3	0	1	1	3	2	0	4	3
0	1	0	1	0	4	4	24	2	0	1	34
3	2	0	0	0	2	2	6	2	5	0	38
0	9	0	0	2	0	38	4	0	1	10	1
2	3	3	10	2	0	0	77	26	21	87	0
1	2	0	4	1	0	0	57	69	0	0	2
0	2	0	0	0	0	1	4	3	0	91	58
1	0	0	6	0	0	2	36	24	0	3	0
6	5	2	5	0	0	4	4	6	0	31	3
0	4	1	0	3	0	1	1	4	0	30	1
0	2	4	6	6	2	1	0	77	50	0	0
0	0	1	0	10	0	44	36	57	85	5	40
0	13	0	0	2	0	3	35	4	24	0	1
1	5	1	0	11	0	0	2	36	1	2	25
8	6	1	0	0	0	4	66	4	0	2	0
0	2	0	0	4	0	3	15	1	25	2	2
6	3	22	0	2	1	9	4	0	14	24	28
0	9	21	2	1	0	5	3	36	1	0	7
1	6	0	0	1	1	31	62	35	2	9	0
2	4	3	1	7	1	15	0	2	6	16	33
0	9	0	2	3	2	2	0	66	21	3	4
0	0	1	1	4	1	1	4	15	18	1	0
0	0	1	2	5	0	0	6	4	8	5	0
0	17	0	1	6	3	4	1	3	2	0	24
1	0	3	6	8	2	15	3	62	3	0	19
0	0	0	18	5	0	2	3	0	84	2	0
0	0	5	1	3	2	10	6	0	4	1	0
0	1	0	2	0	0	3	0	4	0	0	0
0	1	2	3	4	5	0	0	6	9	1	2
0	3	7	2	6	7	4	0	1	8	0	1
0	0	2	9	1	2	3	4	3	0	1	1
0	0	1	3	5	1	39	12	3	77	4	1
1	0	6	1	1	3	4	36	6	1	0	0
1	0	4	2	5	6	8	24	0	3	13	2
0	0	2	4	4	15	5	24	0	17	0	0
0	0	7	1	1	1	5	0	0	14	0	102
1	0	1	0	2	1	57	0	4	6	44	0
0	0	2	5	0	1	21	27	12	1	39	3
1	0	1	2	0	6	4	5	36	2	0	3
1	4	3	0	4	1	69	2	24	8	4	2
3	1	8	0	21	1	60	23	24	28	0	0
1	1	11	19	2	9	0	9	0	2	11	76
4	10	0	4	1	1	70	2	0	39	1	4
0	11	10	2	2	3	4	0	27	10	1	30
1	2	17	0	0	0	1	9	5	6	3	3
11	7	3	4	0	2	0	6	2	1	7	151
2	0	0	0	0	0	0	1	23	1	3	5
2	0	0	0	2	17	0	0	0	120	0	14
4	4	0	0	3	1	3	9	0	0	1	0
1	3	0	11	0	4	0	8	9	3	78	0
3	2	0	0	0	23	44	3	2	0	0	12
0	1	0	2	1	0	1	55	0	0	5	5
2	6	0	1	5	0	52	5	9	5	38	0
0	1	1	3	1	3	3	9	6	1	4	2
0	0	1	0	1	2	1	2	1	1	110	4
1	2	3	0	1	0	5	0	0	0	52	0
0	1	2	0	0	1	0	13	9	3	0	8
0	11	0	0	0	1	0	8	8	1	0	6
2	6	0	2	21	0	3	2	3	0	3	3
0	9	1	2	1	2	9	2	55	0	63	0
1	2	2	2	8	0	11	22	5	0	3	1
2	0	0	1	17	0	0	1	9	7	4	0
0	1	0	6	21	0	19	4	2	1	16	21
4	0	7	5	17	7	1	1	0	6	7	0
0	0	3	4	0	0	0	1	13	0	8	70
1	6	2	0	6	0	21	3	8	4	0	7
4	2	2	2	2	0	4	2	2	3	37	1
1	7	14	5	0	1	0	4	2	36	4	1
0	0	30	1	0	0	3	3	22	2	0	7
1	0	6	0	1	0	0	1	1	4	1	1
0	0	0	0	0	0	2	3	4	18	0	1
0	0	3	1	0	20	1	9	1	15	59	27
0	0	4	0	0	6	6	40	1	30	0	0
0	0	1	1	0	0	2	0	3	0	38	97
3	0	1	3	2	0	2	0	2	3	3	2
0	1	1	2	0	8	0	8	4	10	0	45
0	1	0	4	3	0	1	7	3	17	0	22
0	0	0	8	0	0	0	2	1	0	5	15
0	0	2	7	0	1	35	1	3	1	2	22
0	38	3	0	0	0	12	7	9	0	0	34
0	0	0	5	0	6	0	17	40	0	0	14
0	0	0	0	0	4	3	7	0	0	0	6
1	2	2	1	1	0	7	0	0	5	4	7
0	3	0	2	0	2	7	1	8	48	4	6
0	0	0	7	0	6	5	1	7	53	2	88
0	3	0	3	0	5	1	0	2	0	4	7
0	3	0	1	0	2	4	45	1	0	0	0
1	1	0	0	1	0	1	1	7	0	86	0
0	11	0	0	0	6	69	17	17	3	2	22
0	1	0	0	4	3	22	0	7	0	24	0
0	4	0	6	0	2	65	1	0	10	15	37
0	3	1	3	0	1	33	3	1	1	59	2
0	13	2	1	0	0	18	0	1	8	59	16
0	57	0	1	3	15	3	3	0	17	15	3
0	12	0	0	5	2	0	46	45	1	0	17
7	3	0	1	1	1	1	29	1	1	9	3
3	1	2	1	3	0	6	27	17	28	85	0
3	6	3	4	1	0	0	5	0	56	16	21
2	2	0	5	5	0	1	1	1	55	1	2
6	2	5	0	0	0	2	33	3	2	1	16
0	1	0	0	25	7	2	0	0	36	24	0
2	2	4	0	1	2	0	6	3	3	2	2
0	2	1	31	1	0	0	23	46	0	5	0
5	2	0	1	10	1	4	7	29	16	1	39
4	7	2	0	8	3	6	8	27	29	19	0
1	2	5	0	2	6	0	19	5	3	18	8
0	1	2	7	12	1	7	9	1	50	19	0
1	6	2	1	8	2	3	24	33	1	32	0
4	1	0	0	0	1	2	0	0	3	0	20
1	18	0	0	7	3	0	21	6	31	1	24
0	23	3	0	0	1	1	4	23	51	1	24
7	2	2	0	0	0	11	2	7	0	49	0
0	2	8	2	1	1	0	1	8	46	4	4
3	7	14	0	1	1	0	7	19	0	1	6
3	4	14	24	4	0	2	0	9	9	0	3
0	0	0	2	21	0	6	5	24	1	1	30
20	4	10	2	0	2	53	0	0	0	0	1
10	4	4	2	18	2	0	2	21	2	0	2
0	3	8	8	3	4	0	0	4	26	0	5
1	9	2	3	11	12	46	1	2	1	0	5
10	6	8	15	1	8	22	10	1	0	0	2
0	1	2	2	0	4	0	17	7	0	2	11
0	1	6	2	9	0	7	1	0	0	1	0
0	1	8	2	0	0	0	9	5	19	0	54
8	2	0	1	0	0	3	14	0	13	0	2
1	1	4	5	2	0	7	14	2	0	35	2
1	0	3	3	15	0	8	13	0	0	7	0
1	0	0	7	2	0	1	2	0	0	5	3
2	0	2	1	0	6	3	0	0	25	0	17
0	0	0	2	2	0	7	12	0	2	0	23
2	0	14	7	1	0	0	0	0	0	15	22
0	0	0	3	5	1	2	5	0	0	0	2
0	0	7	6	3	0	33	0	0	42	0	3
0	5	0	5	7	1	0	1	0	0	100	1
5	7	0	0	2	1	0	100	1	0	2	1
0	3	0	0	0	0	15	9	10	0	40	1
1	1	4	0	6	6	6	24	17	0	6	0
1	10	0	1	1	0	10	1	1	0	2	4
3	0	6	0	0	0	0	19	9	0	55	1
1	20	0	25	0	1	2	26	14	6	3	16
3	8	0	1	0	5	0	9	14	3	76	10
0	0	3	1	4	0	1	9	13	4	66	5
7	3	5	2	4	3	7	0	2	28	5	7
0	5	8	0	11	1	8	1	0	2	65	12
1	1	2	0	3	0	0	1	12	4	0	7
10	5	0	5	4	0	4	3	0	9	3	1
2	2	2	1	1	9	1	28	5	54	50	5
0	1	2	0	1	0	23	38	0	90	2	37
0	0	0	12	1	1	0	3	1	36	0	0
2	1	12	1	0	3	3	1	100	1	1	24
0	0	0	9	6	9	1	0	9	98	50	0
0	2	0	0	5	26	1	3	24	88	5	0
0	11	4	3	0	0	7	0	1	9	7	47
0	0	1	0	2	27	15	10	19	10	42	4
0	0	2	0	5	0	1	9	26	0	58	16
0	4	1	2	4	0	1	0	9	1	3	29
0	5	2	0	5	0	36	3	9	0	9	0
1	1	20	5	0	1	0	0	0	92	0	5
0	0	5	3	0	1	1	0	1	1	21	9
0	0	0	6	0	2	3	0	1	0	4	5
0	4	0	5	3	1	47	6	3	13	80	7
0	2	0	2	1	0	0	25	28	6	9	4
6	4	2	1	4	2	2	41	38	0	27	1
8	0	1	7	3	2	12	74	3	36	1	0
1	1	6	6	21	0	12	47	1	1	33	0
0	0	0	0	6	1	2	3	0	1	0	12
0	4	0	0	2	4	2	4	3	0	0	25
0	1	1	0	0	0	2	1	0	44	7	4
1	1	7	0	0	0	7	14	10	3	36	0
0	4	0	0	0	0	0	117	9	1	0	0
0	2	5	0	2	0	1	35	0	31	4	2
11	6	3	0	6	4	1	35	3	0	30	40
2	0	2	0	0	0	1	17	0	70	30	1
18	2	0	10	0	4	1	0	0	4	6	0
3	3	9	1	8	0	2	2	0	6	7	38
1	1	1	0	0	1	77	90	6	8	18	0
1	6	30	0	0	0	2	0	25	73	25	6
0	3	8	0	1	0	15	57	41	0	8	0
4	1	0	0	0	0	0	2	74	8	22	40
0	0	1	10	0	0	29	37	47	1	3	4
5	0	1	1	0	0	6	100	3	7	24	0
3	0	2	5	0	0	2	17	4	0	31	3
1	5	3	0	0	0	2	43	1	6	0	0
0	0	0	2	18	0	70	0	14	21	0	0
0	0	0	8	7	0	2	1	117	19	0	0
2	0	2	0	2	1	54	0	35	0	3	1
1	4	2	9	0	0	23	35	35	39	0	44
0	0	0	9	0	1	2	0	17	0	3	4
0	0	2	7	2	0	2	47	0	25	0	2
0	3	3	2	1	0	0	2	2	0	0	1
1	0	0	3	3	2	23	6	90	3	0	1
1	2	5	5	21	30	0	4	0	1	18	18
0	1	0	2	0	0	0	72	57	7	0	1
0	2	0	1	0	1	3	15	2	0	0	1
0	3	0	5	1	0	10	9	37	0	0	0
0	1	0	0	2	11	1	1	100	30	0	17
0	1	0	3	7	4	4	0	17	1	3	0
1	4	0	4	0	3	9	21	43	2	0	37
2	5	0	0	0	0	5	21	0	1	27	2
0	22	0	1	14	0	3	23	1	0	0	28
0	3	0	5	0	1	22	0	0	0	1	22
1	3	0	0	5	2	34	2	35	0	1	5
0	1	0	19	15	1	30	0	0	2	9	2
0	19	0	6	0	1	12	0	47	45	0	1
1	4	1	8	4	2	20	5	2	0	0	34
0	2	0	2	1	3	44	0	6	9	0	7
2	9	0	0	2	22	28	2	4	0	83	16
0	14	1	2	4	1	1	0	72	0	1	8
0	13	1	6	17	2	67	0	15	2	11	8
1	2	7	0	2	1	12	1	9	60	0	4
28	22	1	8	3	4	106	1	1	0	8	1
0	7	1	2	0	0	0	6	0	2	3	1
0	5	5	0	7	2	44	15	21	4	2	1
0	6	10	0	14	1	0	77	21	8	2	9
4	0	1	6	2	13	50	69	23	6	0	3
0	3	8	5	0	0	4	65	0	53	0	0
2	6	2	0	18	0	34	7	2	2	1	1
1	3	4	16	4	0	1	0	0	55	16	0
0	1	10	8	6	0	17	7	0	5	6	1
18	1	5	10	0	19	48	28	5	3	0	1
0	0	0	0	23	0	4	62	0	22	1	41
0	0	4	1	1	10	2	0	2	37	2	2
2	0	7	0	22	0	0	63	0	0	9	6
1	0	9	10	13	3	82	2	0	4	1	13
6	0	2	0	14	23	68	79	1	34	31	6
0	0	8	1	0	5	0	11	1	0	0	5
4	0	0	22	22	3	1	0	6	112	2	0
0	0	4	0	12	11	8	0	15	7	0	72
1	0	2	0	0	7	4	43	77	0	2	105
0	0	20	16	0	1	92	11	69	22	56	6
0	9	3	0	0	0	16	1	65	0	2	0
2	0	0	3	11	5	0		7	7	1	4
2	1	0	0	0	0	11		0	1	67	11
8	15	0	4	3	10	111		7	0	0	1
9	17	0	0	17	6	2		28	6	0	11
2	1	1	1	0	7	0		62	0	6	13
2	25	3	2	0	16	0		0	2	0	2
69	1		1	0	0	0		63	0	3	51
7	0		1	0	0	0		2	67	1	1
1	4		0	0	2	63		79	4	2	7
2	4		0	10	9	4		11	0	0	5
0	11		1	0	4	0		0	25	1	9
9	7		0	0	0	62		0	0	0	3
1	2		0	0	0	0		43	11	6	5
5	3		1	0	0	0		11	46	12	61
0	0		5	0	1	3		1	0	0	6
3	3		0	0	0	78			28	0	3
1	1		0	5	1	34			34	26	0
3	0		0	19	7	0			0	0	1
4	3		0	0	2	3			0	56	29
0	3		1	1	10	41			1	32	65
0	11		6	5	6	4			87	95	2
0	3		0	0	19	21			0	30	9
0	10		3	4	2	0			2	1	2
6	19		20	6	16	1			5	128	57
0	3		1	3	2	55			0	1
0	0		0	1	7	0			31	15
6	0		8	0	1	0			16	30
7	0		3	17	7	9			1	9
0	3		4	0	8	63			0	2
0	1		17	7	3	9			9	0
0	2		4	2	0	14			0	12
0	0		0	1	0	1			12	0
0			0	2	2	1			6	0
0			3	0	0	0			1	1
0			1	2	0	76			0	36
0			12	3	1	0			0	0
0			27	3	0	2			0	5
0			6	8	8	1			10	0
0			3	7	1	1			7	34
4			0	9	0	7			10	14
0			8	8	4	0			5	0
0			2	4	0	0			4	4
15			11	3	0	10			28	1
1			5	0	5	0			2	0
0			4	2	0	28			15	0
11			3	5	0	0			3	0
3			24	13	0				0	2
10			2	1	3				38	0
1			6	0	1				15	0
0			6	3	0				0	0
1			3	3	9				1	2
4			15	0					77	2
1			6	8					3	0
3			0	3					0	4
11			1	11					1	40
0			0	0					0	0
4			2	5					8	0
3			0	0					50	1
2			1	7					18	1
0			7	4					0	0
4			1	2					1	8
4			0	1					0	1
2			0	2					12	11
3			0	0					0	1
5				0					0	1
2				9					1	2
3				0					1	26
2				0					33	0
4				1					0	2
2				2					0	1
6				0					82	0
0				0					2	32
4				0					3	1
14				0					1	1
0				0					55	93
0				0					2	3
1				0					44	0
11				3					172	2
0				0					0	11
0				6					4	3
0				5					59	1
				12					51	5
				2					1	19
				1					1	1
				10					1	22
				11					1	22
				1						67
				4						58
				5						1
				3						27
				2						1
				6						0
				8						3
				9						1
				0						85
				18						17
				1						3
				0						0
				5						0
				7						0
				2						1
				5						3
				2						5
				6						1
				2						33
				0						7
				2						10
				4						0
				10						23
				8
				1
				0
				24
				3
				10
				0
				12
				11
				0
				9
				0
				0
				0
				4
				0
				1
				0
				0
				0
				0
				0
