# Supplementary material for: A local ATR-dependent checkpoint pathway is activated by a site-specific replication fork block in human cells
Source: eLife journal article supplement (doi:10.7554/elife.87357), 2023-05-23
Supplement: fig4-data3 [file Figure 4D.xlsx]

## Sheet: Figure 4D
	VC						VC + ATRi
PP0-2	1.89498	1.63593	2.99553	2.71714	2.49459	1.90637	1.39962	1.04796	2.6958	2.177	1.96823	1.5902
PP9	1.6626	1.11509	2.05985	1.42795	0.310654	0.253648	0.777051	1.52272	2.83871	3.7269	1.5416	1.71666
PP2	2.09126	2.01306	2.08022	1.66157	1.85631	1.51309	1.10552	1.00467	1.80086	1.34509	1.25662	1.54656
PP52	1.85663	1.60826	1.96177	2.15961	1.79241	1.56632	1.55083	1.25831	1.50667	2.16011	0.0775466	1.24203
PP47	1.62759	1.83191	2.5984	2.82228	1.94862	2.75972	1.23246	1.22064	1.80484	2.53815	4.05183	4.08905
PP10	0.585373	0.580002	0.616282	0.774502	1.16258	1.18385	0.973589	0.725793	1.06269	0.91855	1.01496	1.10748
