# Supplementary material for: A local ATR-dependent checkpoint pathway is activated by a site-specific replication fork block in human cells
Source: eLife journal article supplement (doi:10.7554/elife.87357), 2023-05-23
Supplement: fig4-data3 [file Figure 4E.xlsx]

## Sheet: Figure 4E
	HA-Tus						HA Tus + ATRi
PP0-2	2.19551	2.02565	1.42023	1.16084	1.81506	1.45198	1.30067	2.16001	1.14379	1.80732	6.43075e-05	4.23091e-06
PP9	13.0015	2.84954	5.7036	2.97558	5.73381	5.06124	0.523775	0.710506	2.2521	2.53564	1.18355	1.53599
PP2	2.78836	2.69322	1.33578	1.13022	8.93104	6.95233	0.789878	1.57064	1.57132	2.47123	2.04301	2.16083
PP52	2.28741	2.00822	2.68483	1.65513	2.1748	1.9246	1.27461	2.52383	0.718574	0.953946	1.25931	2.39159
PP47	12.6387	7.83757	5.48795	3.19435	9.5081	8.39723	0.88353	0.616913	3.42048	3.96352	2.36367	2.81643
PP10	1.48529	1.39807	0.776334	0.717821	1.12223	0.922775	1.24408	1.37987	0.846797	1.15281	1.18982	1.76869
