# Supplementary material for: A local ATR-dependent checkpoint pathway is activated by a site-specific replication fork block in human cells
Source: eLife journal article supplement (doi:10.7554/elife.87357), 2023-05-23
Supplement: fig4-figsupp1-data1 [file Figure 4-Fig Sup 1B.xlsx]

## Sheet: Figure 4-Fig Sup 1B
	G1				S				G2
VC	53.9	55.5	52.8		10.9	11.7	11.7		32.5	31.2	33.6
Tus	62.9	64.7	64.3		11.2	12	10.8		24.6	22	23.1
VC	95.9	96.1	97.5		1.4	2.67	1.37		0	0.00482	0
Tus	97.2	97.5	97.1		1.37	1.28	1.2		0.00552	0	0.011
