# Supplementary figures and images for: A local ATR-dependent checkpoint pathway is activated by a site-specific replication fork block in human cells
Source: eLife journal article supplement (doi:10.7554/elife.87357), 2023-05-23

Figure 2 - Figure Supplement 1-source data

B)

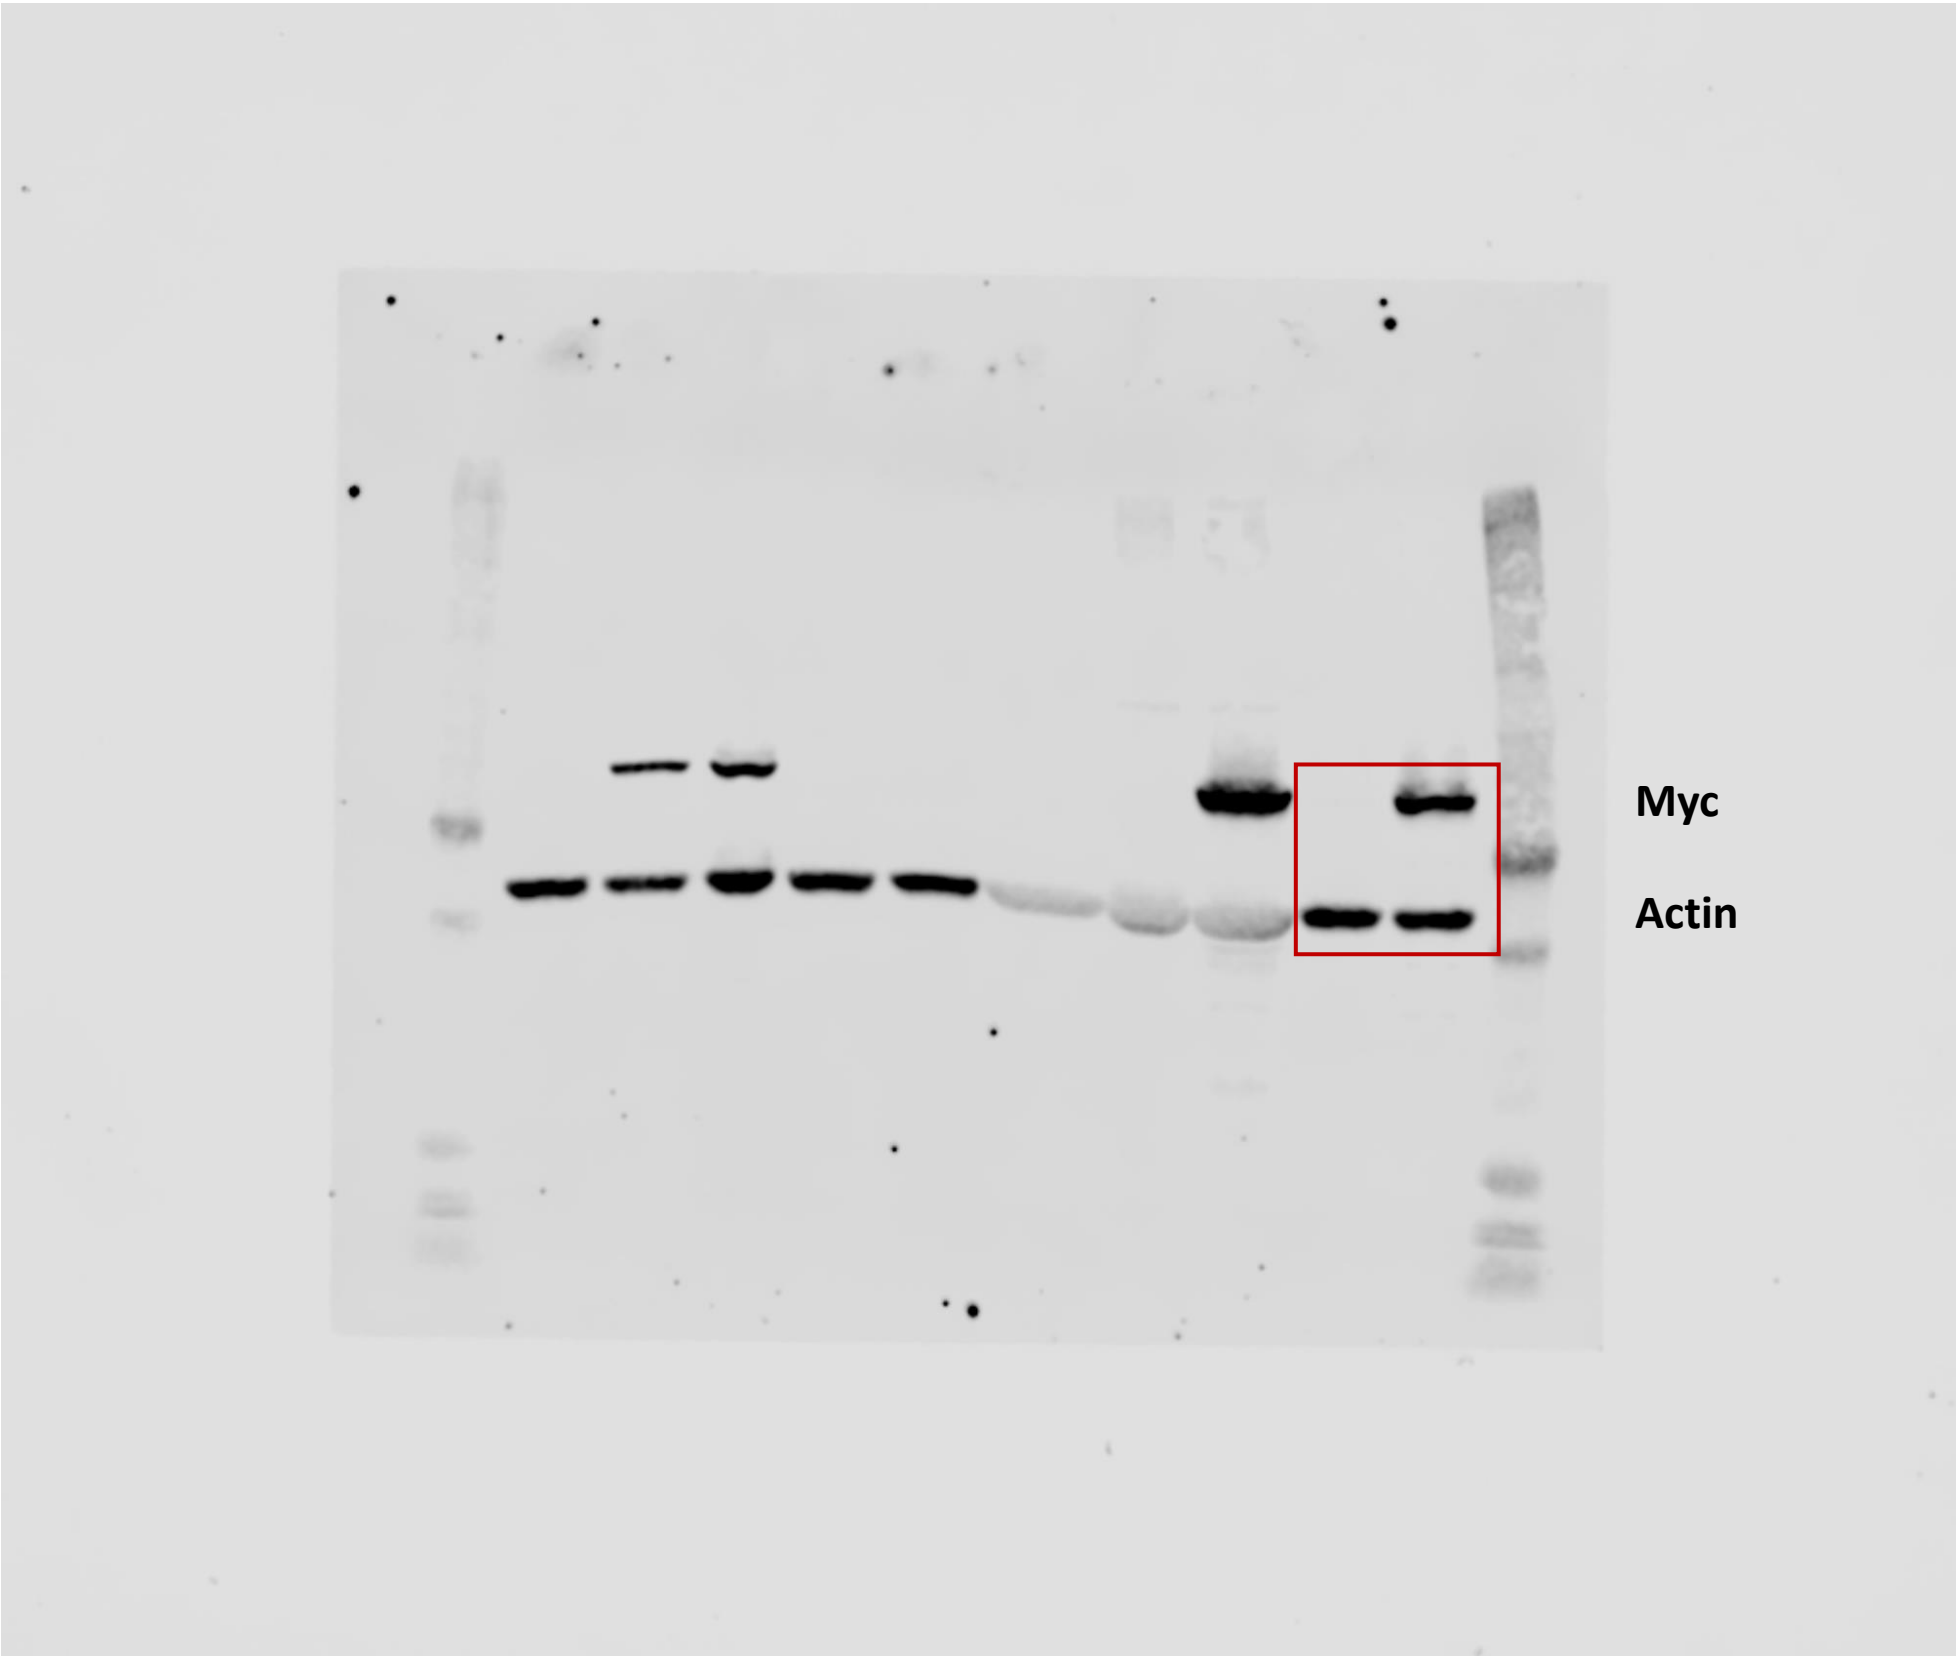

Supplement: fig2-figsupp1-data1 [file elife-87357-fig2-figsupp1-data1-v1.zip]

Figure 3 -source data

A)

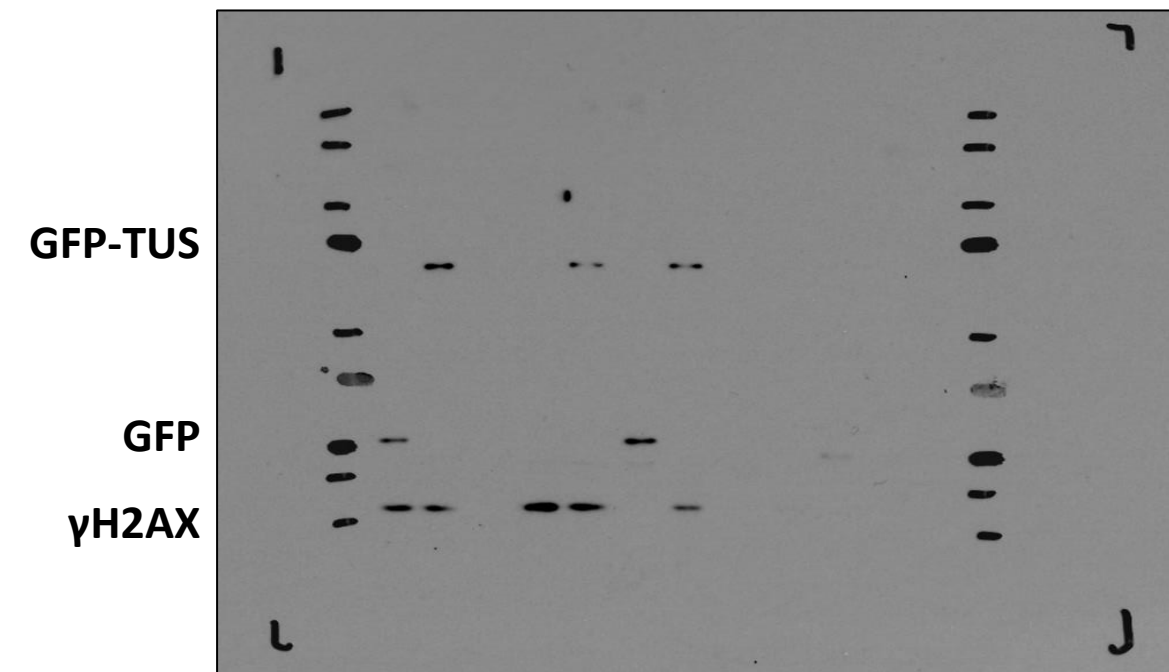

Supplement: fig3-data1 [file elife-87357-fig3-data1-v1.zip]

Figure 3 - Figure supplement 1-source data

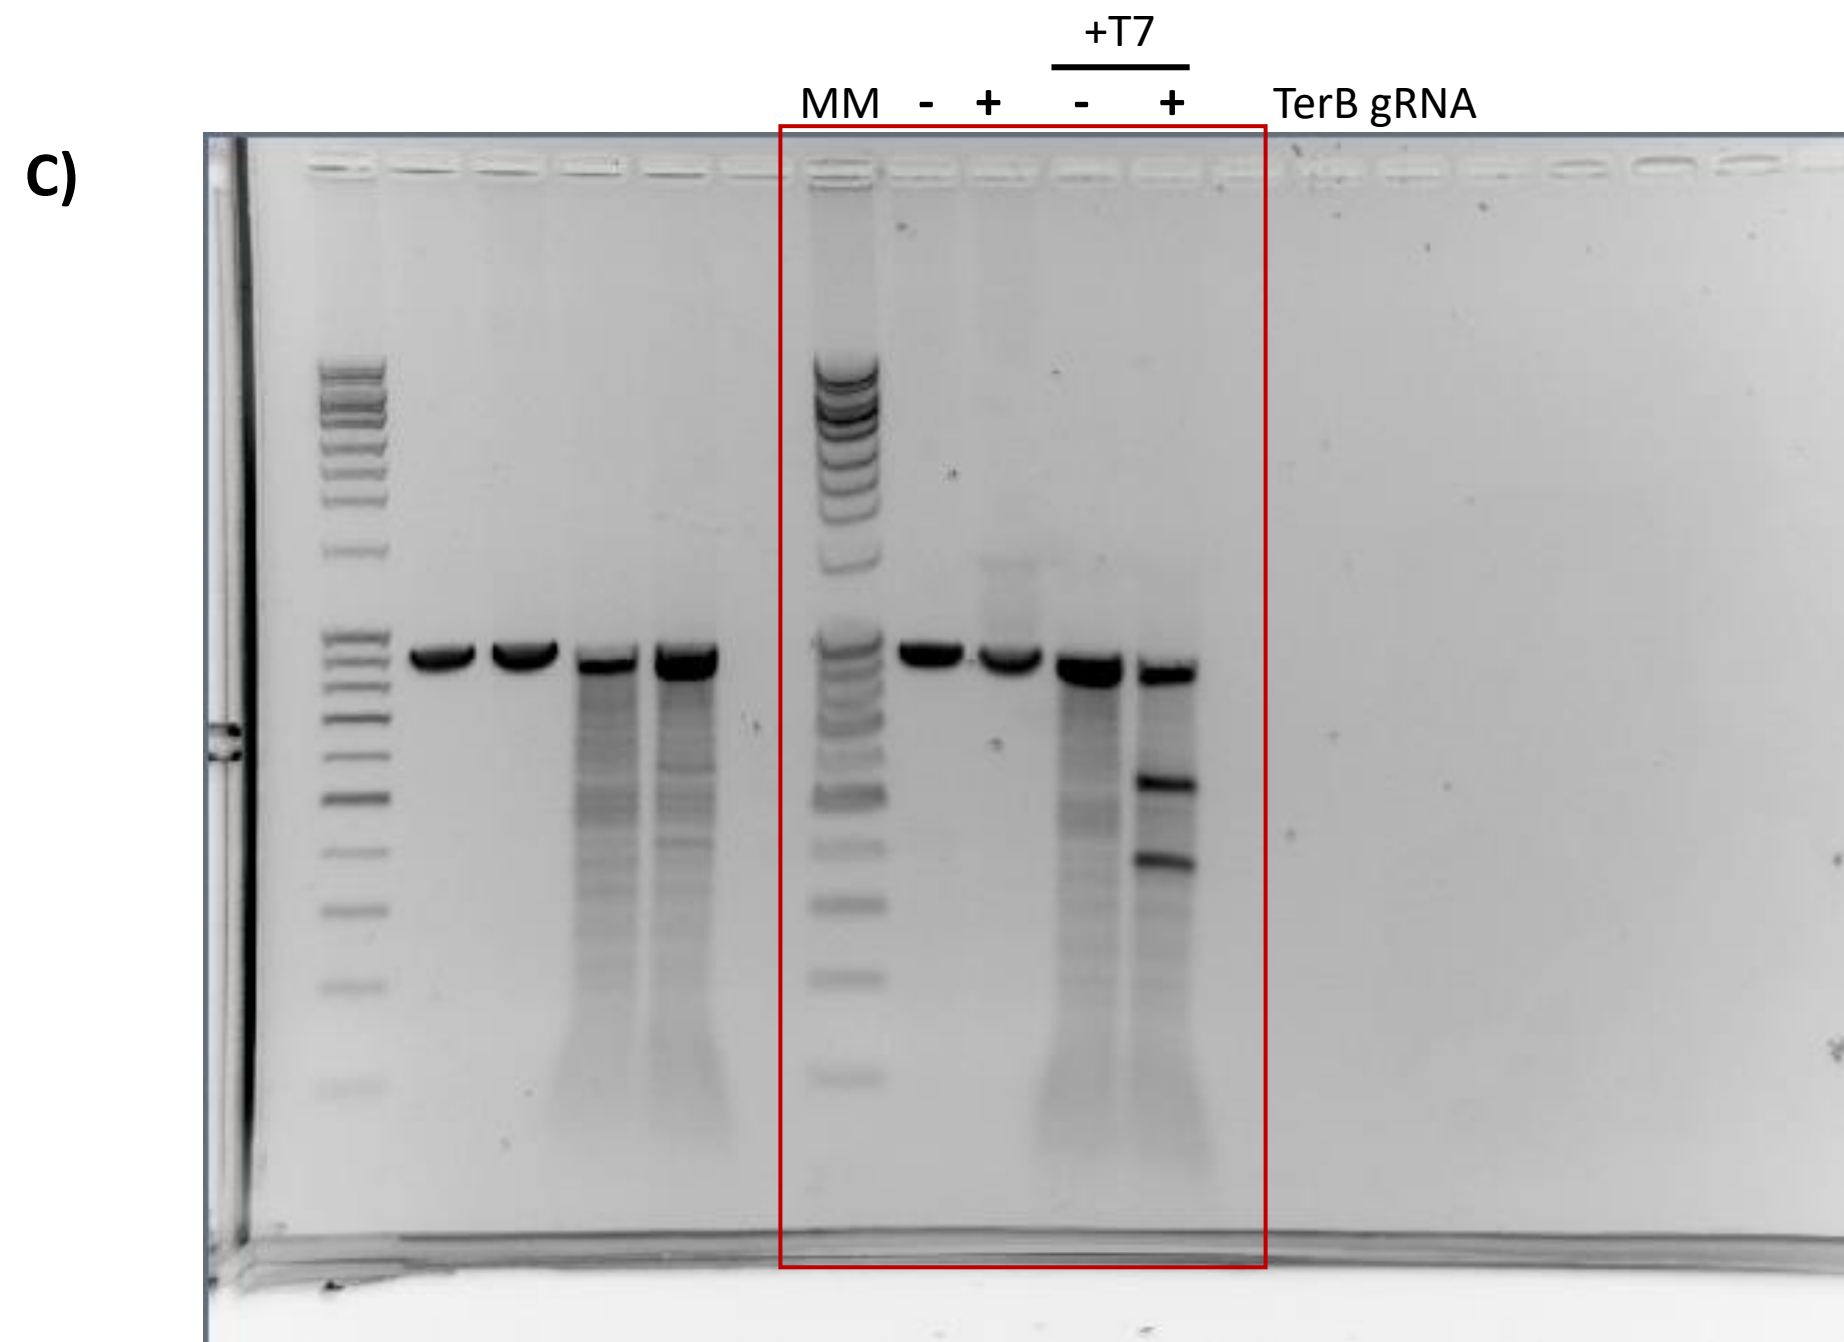

Supplement: fig3-figsupp1-data1 [file elife-87357-fig3-figsupp1-data1-v1.zip]

# Figure 4-source data

A)

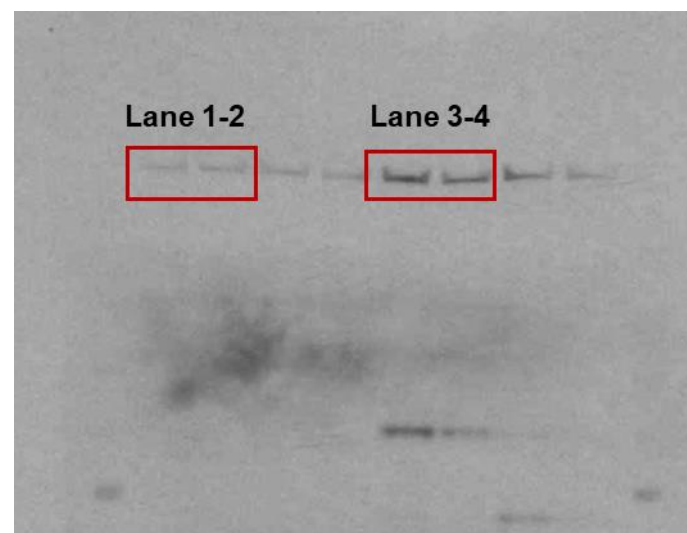

pATR (TH1989)

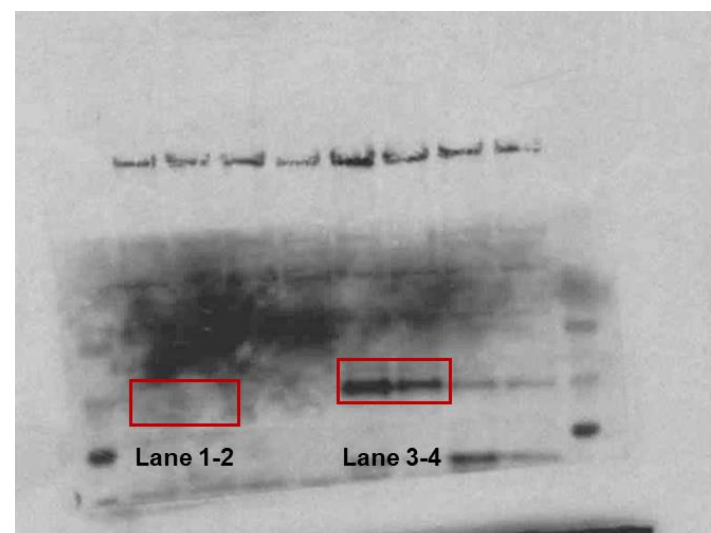

pCHK1 S345

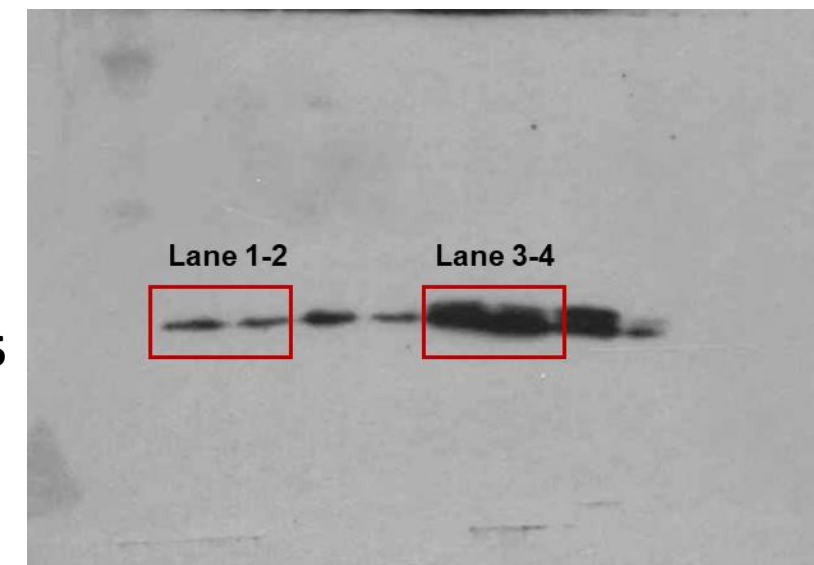

RPA/pRPA

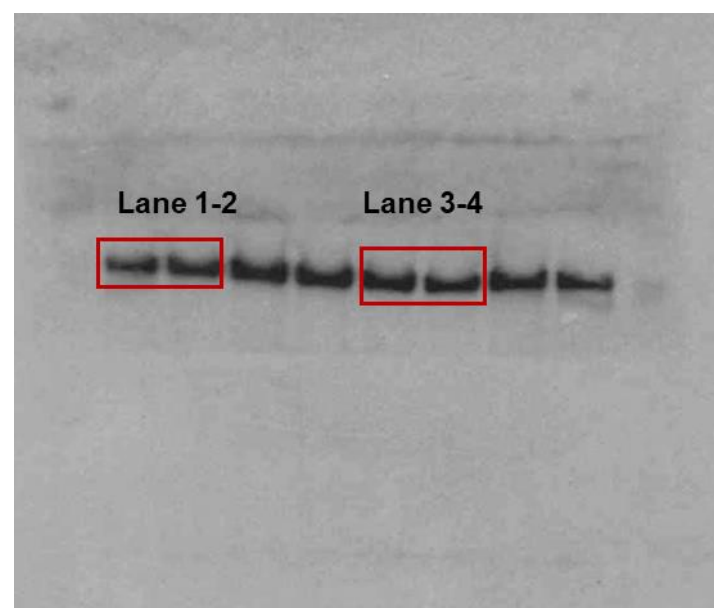

Total ATR

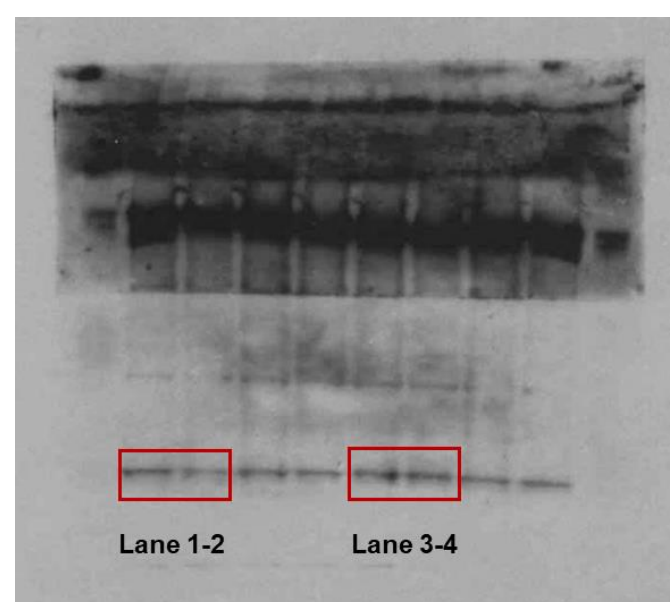

Total CHK1

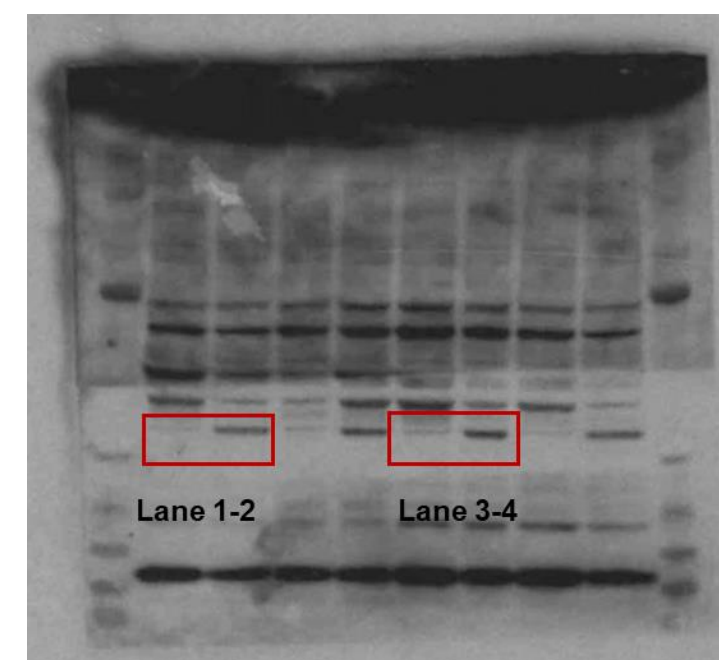

Tus

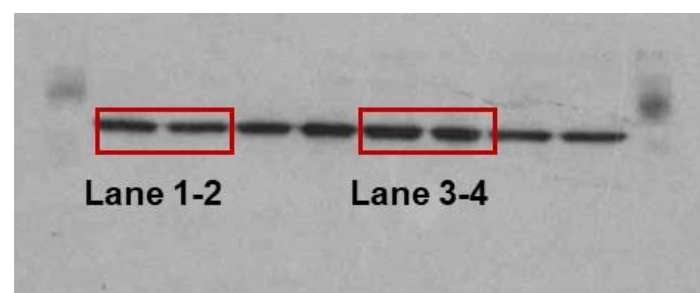

GAPDH

Supplement: fig4-data1 [file elife-87357-fig4-data1-v1.zip]

Figure 4-source data

B)

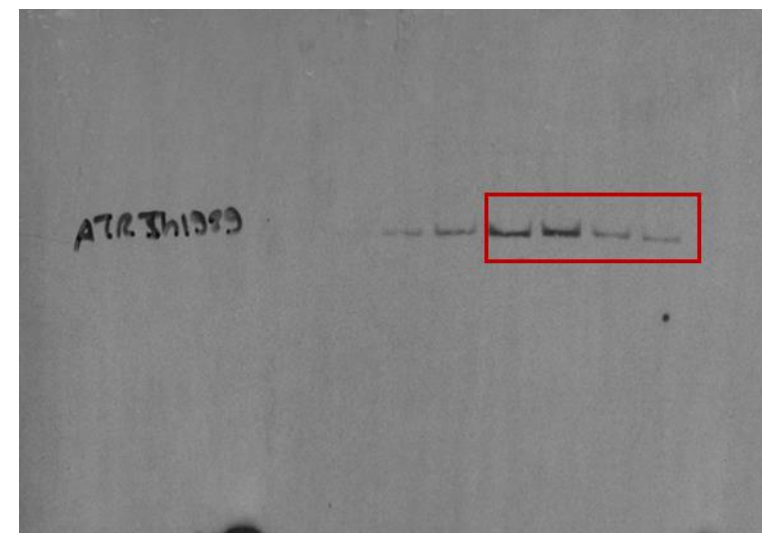

pATR

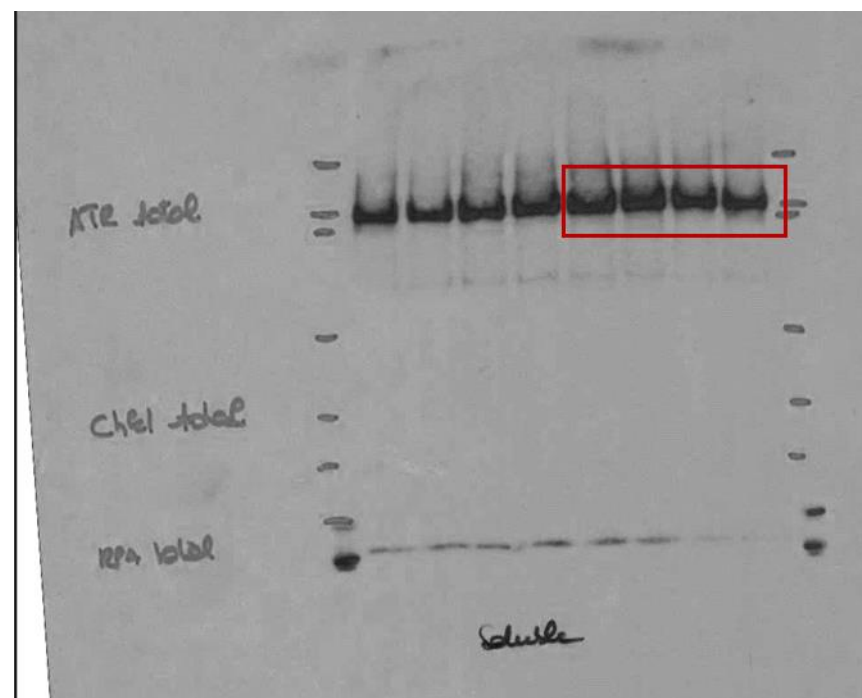

Total ATR

Supplement: fig4-data2 [file elife-87357-fig4-data2-v1.zip]
